# Supplementary material for: Preparation of hybrid thin film modified carbon nanotubes on glassy carbon electrode and its electrocatalysis for oxygen reduction
Source: Royal Society of Chemistry journal article supplement (doi:10.1039/b311038a), 2003-12-19
Supplement: b311038a.pdf [file b311038a.pdf]

## Supplementary information

*Authors:* Jianying Qu, Yan Shen, Xiaohu Qu and Shaojun Dong\*

*Title:* **Preparation of hybrid thin film modified carbon nanotubes on glassy carbon electrode and its electrocatalysis for oxygen reduction**

*Journal:* **ChemMumm**

**1. Fig S1.** Cyclic voltammograms of O<sub>2</sub> reduction at MWNTs/CoTMPyP/Pt hybrid film modified GC electrode with different scan rates: 0.02, 0.04, 0.06, 0.08, 0.10, 0.12, 0.14, 0.16, 0.18 and 0.20 V/s. Electrolyte: air-saturated 0.1M HAc-NaAc (pH 3.8) buffer solution. The inset shows the plot of the electrocatalytic oxygen reduction peak currents as a function of the square root of scan rates.

**2.** An EG&G PARC model 636 rotating ring disk electrode system and EG&G PARC model 366 bipotentiostat were used for rotating disk and rotating ring-disk voltammetry experiments. A rotating GC disk-platinum ring electrode was used as a working electrode. The collection efficiency (*N*) of the ring electrode obtained by reducing ferricyanide at disk electrode was 0.1512.

**Figure S2.** (A) Current-potential curves of O<sub>2</sub> reduction at a RDE modified with one layer of MWNTs/CoTMPyP/Pt hybrid film modified GC electrode with different rotating rate in air-saturated 0.1 M HAc-NaAc (pH 3.8) solution. (B) Koutecky-Levich plot of  $i_l^{-1} - \omega^{-1/2}$  obtained from the RDE data of fig.S2(A). The dashed lines **a** and **b** were calculated for the diffusion-convection controlled reduction of O<sub>2</sub> by two (n=2) or four (n=4) electrons.

From the figure S2, the slope of the Koutecky-Levich plot is very close to that calculated for the four-electron reduction of O<sub>2</sub> to H<sub>2</sub>O (dashed line in figure S2B**(b)**), and the number of electron transfer for oxygen reduction at MWNTs/CoTmPyp/Pt hybrid film modified GC electrode was evaluated to be about 3.9, indicating mainly a 4e process of oxygen reduction.

**Figure S3.** Rotating ring-disk electrode voltammograms of one layer of MWNTs/CoTMPyP/Pt hybrid film modified GC electrode (scan rate  $20\text{mV s}^{-1}$ ,  $\omega = 100$  rpm) in air-saturated  $0.1\text{ M HAc-NaAc}$  (pH 3.8) solution. The potential of the platinum ring electrode was set to  $1.0\text{ V}$  in order to oxidize  $\text{H}_2\text{O}_2$  to  $\text{O}_2$  completely.

From the figure S2, the number of electron transfer for oxygen reduction at one layer of MWNTs/CoTmPyp/Pt hybrid film modified GC electrode was evaluated to be about 3.6, which is consistent with the result from RDE experiment. This confirmed the conclusion that mainly a  $4e$  process of oxygen reduction at one layer of MWNTs/CoTMPyP/Pt hybrid film modified GC electrode.

## Supplementary information

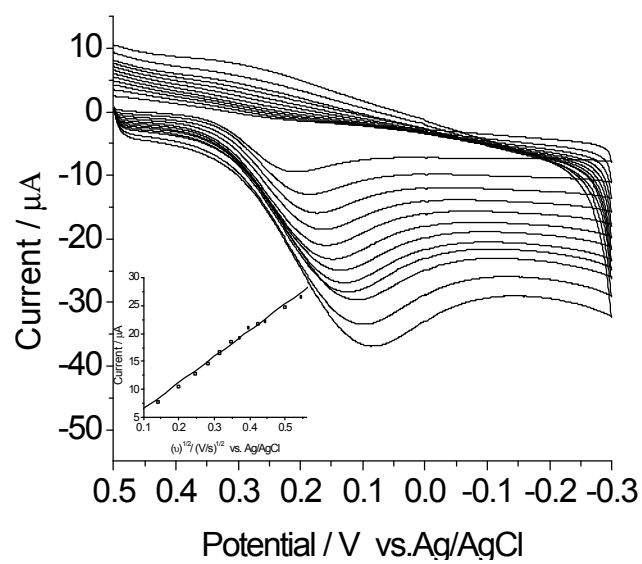

**Fig. S1**

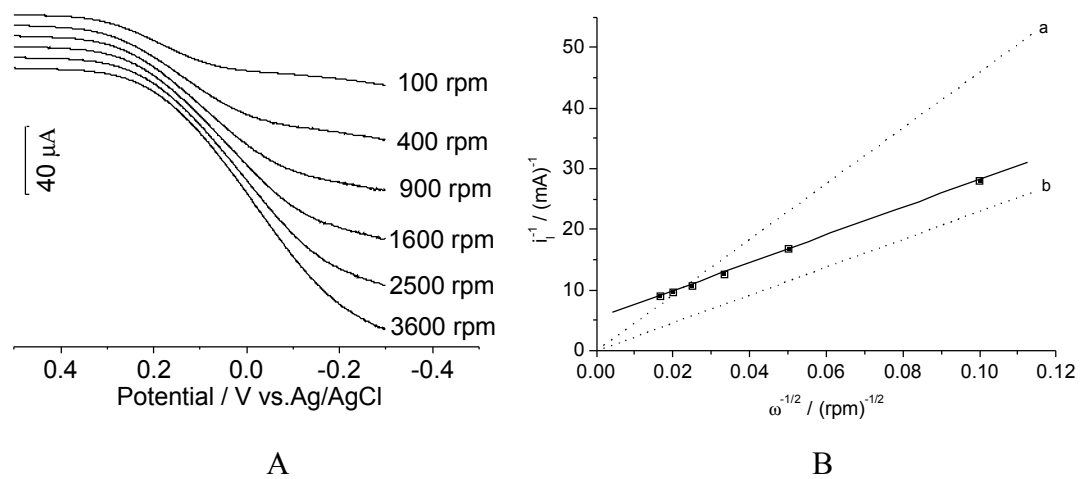

Fig. S2

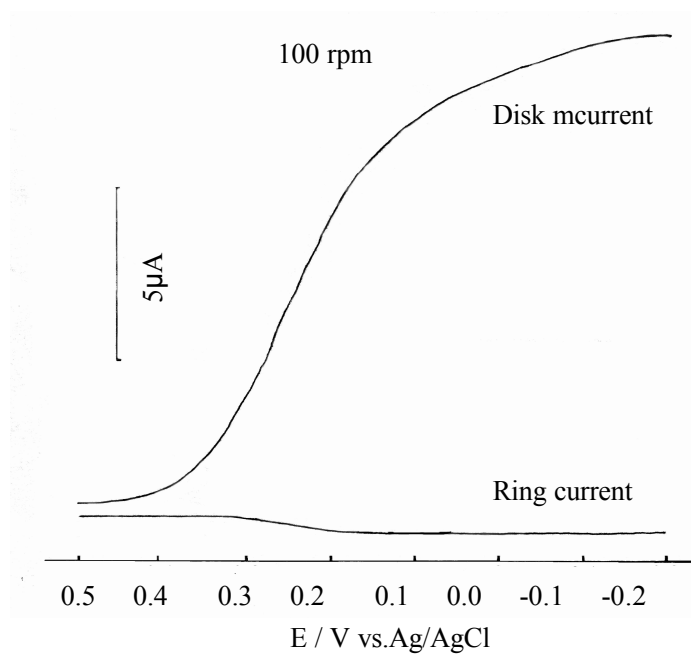

**Fig. S3**
